# Supplementary material
Source: PubMed Central journal article supplement (PMC6028181)

Supplemental Fig 2

Experiment 1: Behavioral counterbalancing for post-training diet assignments.

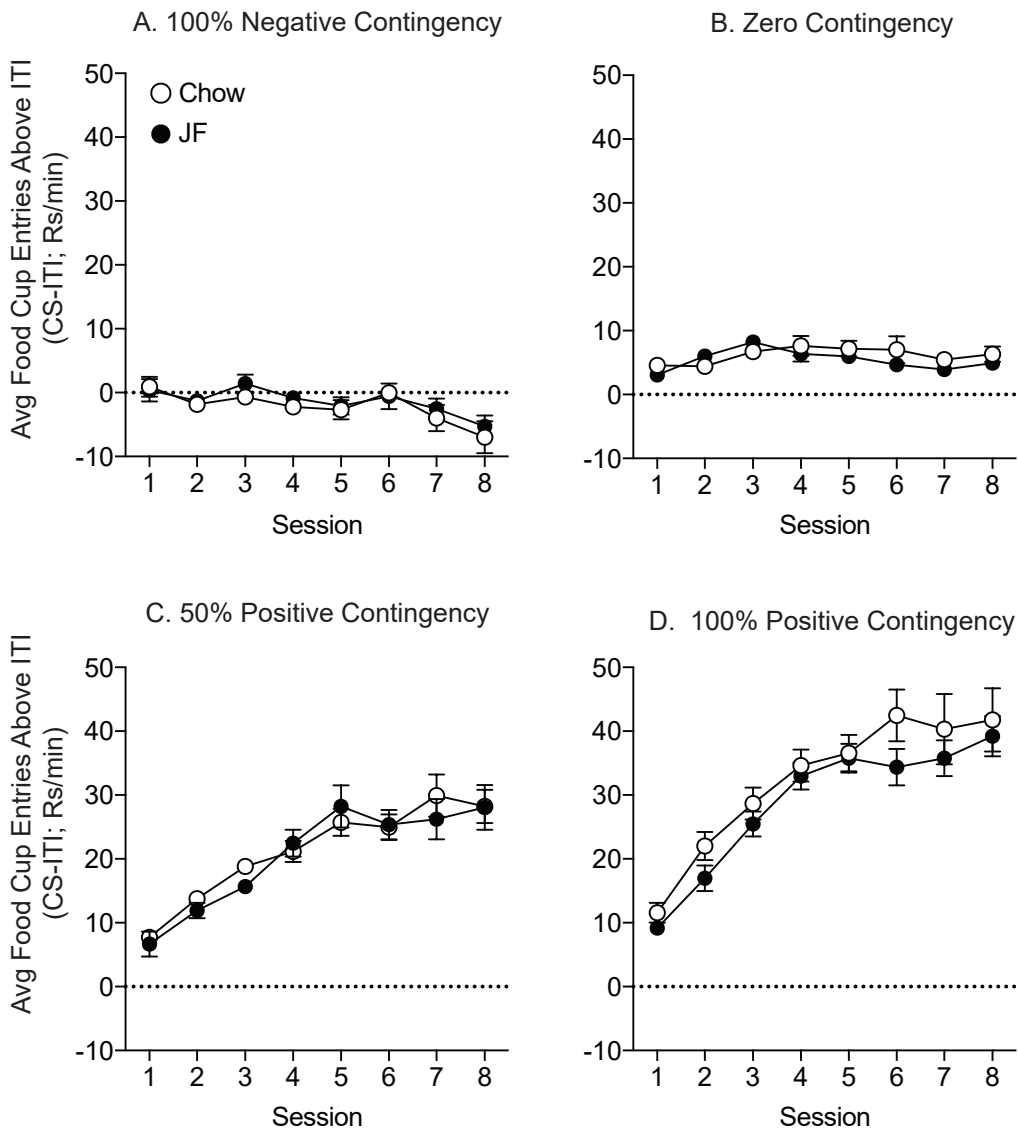

Exp. 1: Consumption of JF and Chow During Post-Conditioning Period.

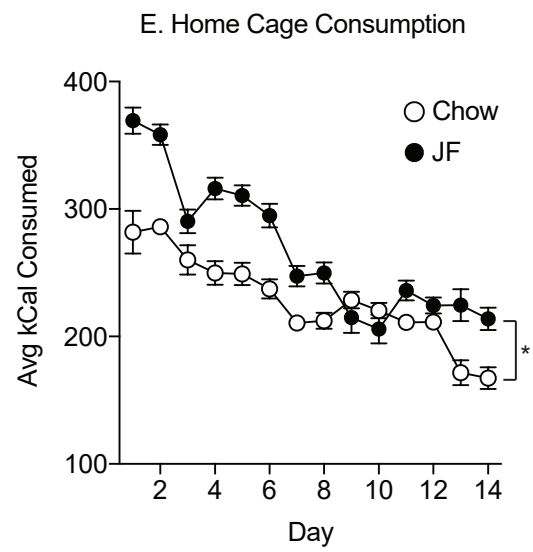

Supplement: NIHMS960033-supplement-2.pdf [file NIHMS960033-supplement-2.pdf]
