# Supplementary material
Source: PubMed Central journal article supplement (PMC6028181)

Supplemental Fig 5

Experiment 2: Behavioral counterbalancing for post-training diet assignments.

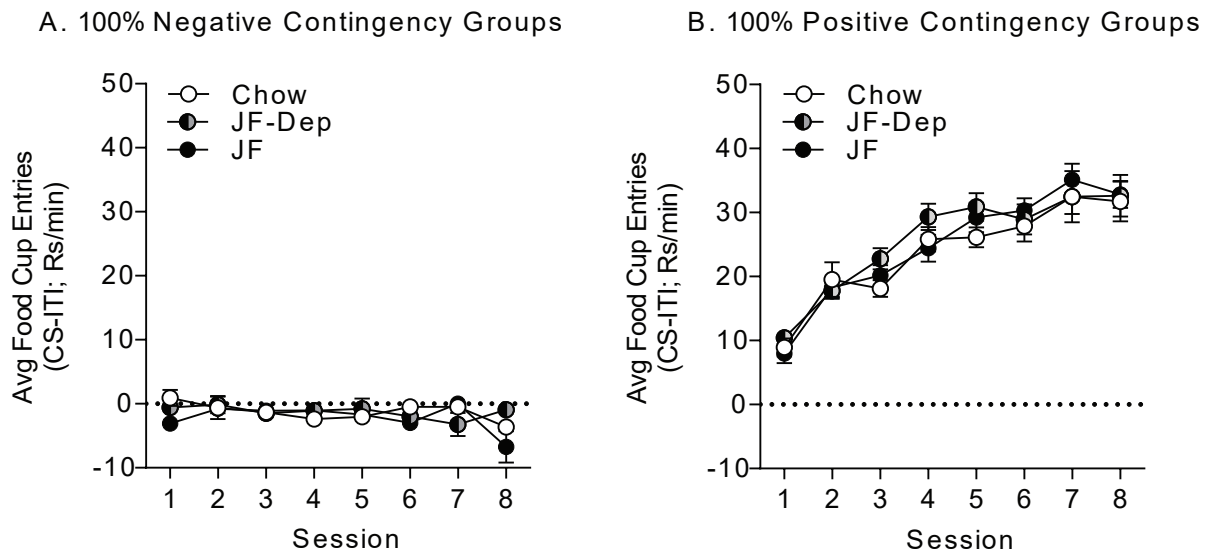

Supplement: NIHMS960033-supplement-5.pdf [file NIHMS960033-supplement-5.pdf]
