# Supplementary material
Source: PubMed Central journal article supplement (PMC6028181)

Supplemental Fig 1

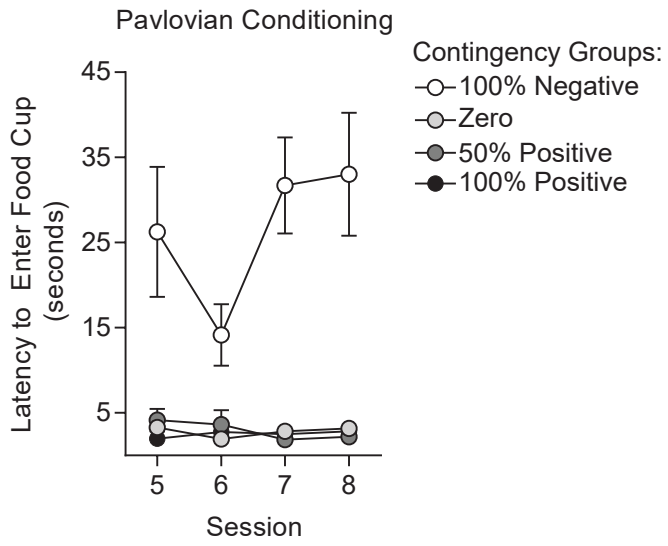

Supplement: NIHMS960033-supplement-1.pdf [file NIHMS960033-supplement-1.pdf]

Experiment 1. Cue-Potentiated Feeding Test Pellet Intake Across Phases.

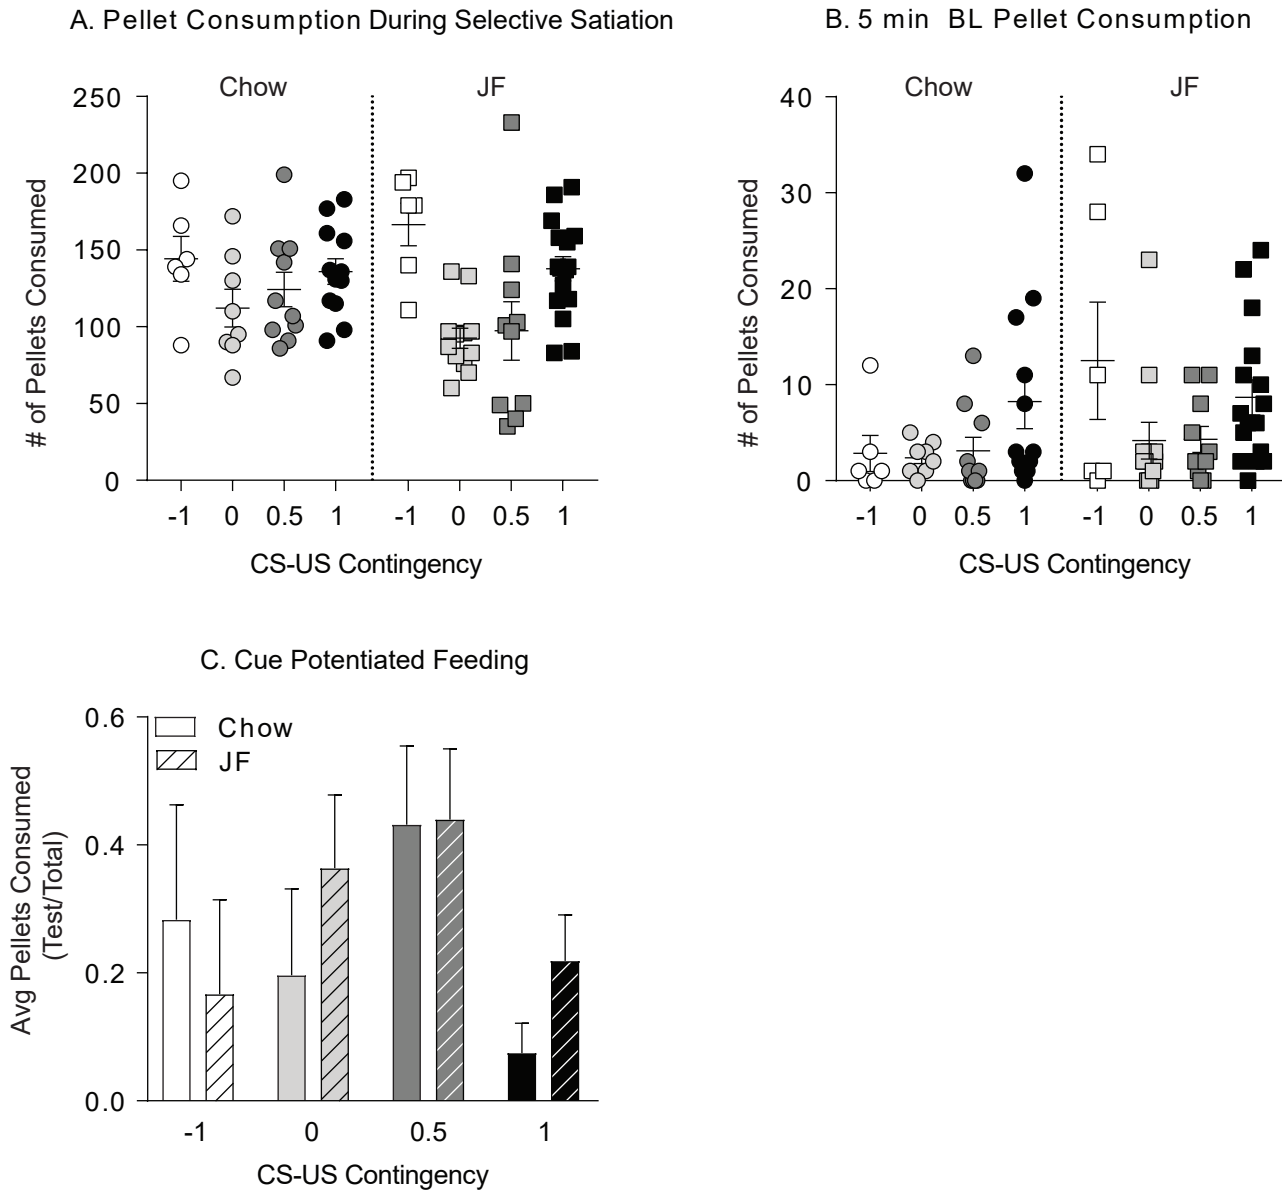

Supplement: NIHMS960033-supplement-3.pdf [file NIHMS960033-supplement-3.pdf]

By Trial Data During the Reinstatement Test

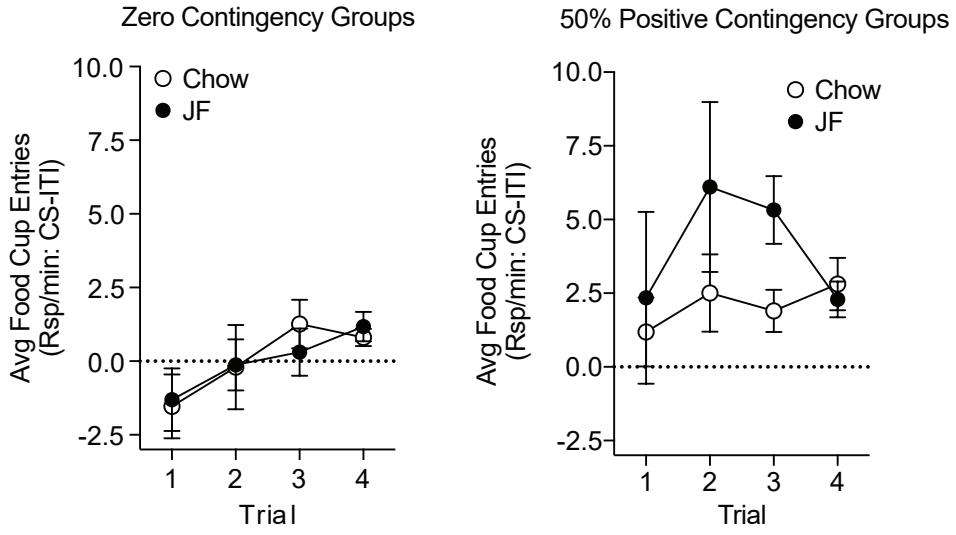

Supplement: NIHMS960033-supplement-4.pdf [file NIHMS960033-supplement-4.pdf]
